# Supplementary material for: Impact of a Care Management Entity on Use of Psychiatric Services Among Youths With Severe Mental or Behavioral Disorders
Source: Atypon-hosted journal article supplement (doi:10.1176/appi.ps.201600539), 2018-09-17

| <b>Demographics Characteristics</b>                |       |       |       |       |     |       |     |
|----------------------------------------------------|-------|-------|-------|-------|-----|-------|-----|
| Age at index date (yrs)                            |       |       |       |       |     |       | .17 |
| 3 to <13                                           | 652   | 27.38 | 561   | 29.64 | 91  | 18.65 |     |
| 13 to <17                                          | 1,074 | 45.11 | 800   | 42.26 | 274 | 56.15 |     |
| 17 to 22 <sup>a</sup>                              | 655   | 27.51 | 532   | 28.10 | 123 | 25.20 |     |
| Gender                                             |       |       |       |       |     |       | .19 |
| Female                                             | 933   | 39.19 | 752   | 39.73 | 181 | 37.09 |     |
| Male                                               | 1,448 | 60.81 | 1,141 | 60.27 | 307 | 62.91 |     |
| Race                                               |       |       |       |       |     |       | .20 |
| African American                                   | 1,503 | 63.12 | 1,181 | 62.39 | 323 | 66.19 |     |
| Others <sup>b</sup>                                | 188   | 7.90  | 157   | 8.29  | 31  | 6.35  |     |
| White                                              | 689   | 28.94 | 555   | 29.32 | 134 | 27.46 |     |
| Medicaid Coverage Group at Index Date              |       |       |       |       |     |       | .21 |
| Foster care                                        | 600   | 25.20 | 465   | 24.56 | 135 | 27.66 |     |
| Others <sup>c</sup>                                | 258   | 10.84 | 210   | 11.09 | 48  | 9.84  |     |
| SSI                                                | 970   | 40.74 | 777   | 41.05 | 193 | 39.55 |     |
| TANF                                               | 553   | 23.23 | 440   | 23.24 | 113 | 23.16 |     |
| <b>Clinical Characteristics</b>                    |       |       |       |       |     |       |     |
| Prior Medication Use <sup>d</sup>                  |       |       |       |       |     |       |     |
| Antipsychotics                                     | 885   | 37.17 | 639   | 33.76 | 246 | 50.41 | .42 |
| ADHD Medication                                    | 936   | 39.31 | 732   | 38.67 | 204 | 41.80 | .29 |
| Antidepressant                                     | 1,828 | 76.77 | 1,453 | 76.76 | 375 | 76.84 | .41 |
| Lithium                                            | 107   | 4.49  | 69    | 3.65  | 38  | 7.79  | .28 |
| Mood stabilizer/<br>Anticonvulsants                | 236   | 9.91  | 179   | 9.46  | 57  | 11.68 | .21 |
| Prior Mental Health-Related Diagnosis <sup>e</sup> |       |       |       |       |     |       |     |
| Schizophrenia                                      | <11   | <0.46 | <11   | 0.58  | <11 | <2.25 | .06 |
| Bipolar disorder                                   | 35    | 1.47  | 21    | 1.11  | 14  | 2.87  | .02 |
| Depression                                         | 25    | 1.05  | 16    | 0.85  | <11 | <2.25 | .01 |
| Anxiety                                            | 97    | 4.07  | 72    | 3.80  | 25  | 5.12  | .10 |
| Conduct disorder                                   | <11   | <0.46 | <11   | <0.58 | <11 | <2.25 | .05 |
| Impulse control disorder                           | 14    | 0.59  | 11    | 0.58  | <11 | <2.25 | .01 |
| Oppositional defiant disorder                      | 46    | 1.93  | 33    | 1.74  | 13  | 2.66  | .06 |
| ADHD                                               | 350   | 14.70 | 264   | 13.95 | 85  | 17.42 | .04 |

ADHD, Attention-deficit/hyperactivity disorder; TANF, Temporary Assistance for Needy Families; SD, standardized difference; SSI, Supplemental Security Income

a. Up to 22 years old at discharge

b. Others include Asian, Native American, and Pacific Islander

c. Others include home and community based services (HCBS) waivers, federal poverty level (FPL) up to 138 percent, Maryland children's health program (PW/MCHP), and long-term care

d. One year prior to the index.

e. The categories are not mutually exclusive.

f. Standardized difference is equal to the difference in means or proportions divided by standard error. SD is referred to Cohen's Effect Size Index, which primarily to evaluate the balance in baseline covariates between youth in the care management entity and a comparison group.

**Supplemental Table 3** Demographic, clinical, and program characteristics of participants in care management entity with complete and missing discharge dates

| Variable Description                         | Overall (N=709) | Complete Data (N=583) | Incomplete data (N=126) | P-value |
|----------------------------------------------|-----------------|-----------------------|-------------------------|---------|
| Demographic Characteristics, N(%)            |                 |                       |                         |         |
| Age (Mean, SD)                               | 14.05 (3.06)    | 14.09 (2.98)          | 13.86 (3.39)            | .434    |
| Gender                                       |                 |                       |                         |         |
| Female                                       | 289 (40.76%)    | 242 (41.51%)          | 47 (37.30%)             | .383    |
| Male                                         | 420 (59.24%)    | 341 (58.49%)          | 79 (62.70%)             |         |
| Race                                         |                 |                       |                         |         |
| Black                                        | 449 (63.33%)    | 358 (61.407%)         | 91 (72.22%)             | .046    |
| Other                                        | 38 (5.36%)      | 35 (6.00%)            | 3 (2.38%)               |         |
| White                                        | 222 (31.31%)    | 190 (32.59%)          | 32 (25.40%)             |         |
| Medicaid Coverage Group at Index Date*       |                 |                       |                         |         |
| SSI                                          | 180 (25.39%)    | 147 (25.21%)          | 33 (26.19%)             | .356    |
| TANF                                         | 190 (26.80%)    | 162 (27.79%)          | 28 (22.22%)             |         |
| Foster/Adoption                              | 240 (33.85%)    | 190 (32.59%)          | 50 (39.68%)             |         |
| Others                                       | 99 (13.96%)     | 84 (14.41%)           | 15 (11.90%)             |         |
| Region <sup>a</sup>                          |                 |                       |                         |         |
| Unknown                                      | 5 (0.71%)       | 4 (0.69%)             | 1 (0.74%)               | .895    |
| Western                                      | 39 (5.54%)      | 39 (6.69%)            | -                       |         |
| Capital                                      | 90 (12.78%)     | 79 (13.55%)           | 11 (8.73%)              |         |
| Central                                      | 395 (56.11%)    | 315 (54.03%)          | 80 (63.49%)             |         |
| Southern                                     | 5 (0.71%)       | 5 (0.86%)             | -                       |         |
| Eastern shore                                | 5 (0.71%)       | 4 (0.69%)             | 1 (0.79%)               |         |
| Clinical Characteristics, N(%)               |                 |                       |                         |         |
| Prior Psychotropic Medication Use            |                 |                       |                         |         |
| ADHD Medication                              | 332 (46.83%)    | 274 (47.00%)          | 58 (46.03%)             | .844    |
| Antipsychotic                                | 444(62.62%)     | 374 (63.82%)          | 70 (55.56%)             | .708    |
| Antidepressant                               | 241 (33.99%)    | 194 (33.28%)          | 47 (37.30%)             | .387    |
| TCA                                          | 5 (0.71%)       | 4 (0.69%)             | 1 (0.79%)               | .896    |
| Others <sup>†</sup>                          | 101 (14.25%)    | 85 (14.58%)           | 16 (12.70%)             | .584    |
| Mood Stabilizer                              | 62 (8.75%)      | 50 (8.58%)            | 12 (9.52%)              | .733    |
| Anticonvulsant                               | 84 (11.85%)     | 69 (11.84%)           | 15 (11.91%)             | .983    |
| Prior Mental Health-Related Diagnosis        |                 |                       |                         |         |
| Depression                                   | 9 (1.27%)       | 7 (1.20%)             | 2 (1.59%)               | .725    |
| Anxiety                                      | 50 (7.05%)      | 45 (7.72%)            | 5 (3.97%)               | .136    |
| Conduct disorder                             | 6 (0.85%)       | 5 (0.86%)             | 1 (0.79%)               | .943    |
| Oppositional defiant disorder                | 30 (4.23%)      | 24 (4.12%)            | 6 (4.76%)               | .744    |
| ADHD                                         | 124 (17.49%)    | 98 (16.81%)           | 26 (20.64%)             | .305    |
| Care management entity characteristics, N(%) |                 |                       |                         |         |
| Funding Source                               |                 |                       |                         |         |

|                       |              |               |             |      |
|-----------------------|--------------|---------------|-------------|------|
| DJS                   | 150 (21.16%) | 125 (21.44%)  | 25 (19.84%) | .413 |
| DHR                   | 228 (32.16%) | 192 (32.936%) | 36 (28.57%) |      |
| System of Care Grants | 220 (31.03%) | 173 (29.67%)  | 47 (37.30%) |      |
| Others <sup>b</sup>   | 111 (15.66%) | 93 (15.95%)   | 18 (14.29%) |      |

*ADHD* Attention-deficit/hyperactivity disorder (ADHD), *TCA* Tricyclic antidepressants, *TANF* Temporary Assistance for Needy Families, *SSI* Supplemental Security Income, *DJS* Department of Juvenile Services, *DHR* Department of Human Resources

a. Western: Garrett, Allegany, and Washington Counties; Capital: Frederick, Montgomery, and Prince George's Counties; Central: Anne Arundel, Baltimore city, Baltimore county, Carroll, Harford, and Howard; Southern: Calvert, Charles, St. Mary's; Eastern Shore: Kent, Queen Anne's, Talbot, Caroline, Dorchester, Wicomico, Somerset, Worcester, and Cecil.

b. Others included Community Services Initiative, RTC Waiver, Rehabilitation Services Option, and Stability Initiative

**Supplemental Document** Missing data management in youth with the care management entity who had missing length of stay (LOS) in the enrollment (i.e, no discharge date available in the original claims)

The missing discharge date was calculated by summing the imputed LOS in the care management entity service and date of enrollment. The imputed LOS in the care management service was imputed by multiple imputation methods.

The Multiple Chain Monte Carlo (MCMC) method was used to generate pseudorandom draws from a probability distribution based on the Bayesian framework.<sup>1-3</sup> Assuming the data follows multivariate normal distribution, the following two steps are applied to Bayesian inference: 1) data imputation and 2) posterior steps. First, the data imputation step simulated the missing values independently. Here, the variable with a missing observation is denoted by  $Y_i(\text{missing})$  and the variable with an existing value  $i$  by  $Y_i(\text{observed})$ . This step drew values for a missing value from a conditional distribution  $Y_i(\text{missing})$  given the observed values  $Y_i(\text{observed})$ . The second step, posterior step, simulated the posterior distribution from the complete estimates after the first step. Then, new estimates were obtained by repeating the first step for the next missing observation. The two steps above were repeated in sufficient cycles to converge to a stationary distribution of LOS and generated average estimates for each missing value.

We used a SAS/STAT procedure, PROC MI, to conduct the MCMC method to create 5 simulated datasets for missing LOS in the care management, with the number of iterations set to 100 by SAS default. SAS/STAT procedure, PROC MIANALYZE, was then used to generate the statistical inference about the missing LOS in the care management service by combining the five imputed datasets together. [ENREF 19](#)<sup>3</sup>

References:

1. Schafer JL. Multiple imputation: a primer. *Statistical methods in medical research*. Mar 1999;8(1):3-

15.

2. He Y. Missing data analysis using multiple imputation: getting to the heart of the matter. *Circulation. Cardiovascular quality and outcomes*. Jan 2010;3(1):98-105.
3. Yuan Y. Multiple Imputation Using SAS Software. *Journal of Statistical Software*. 2011;45(6).

## Cohort Selection

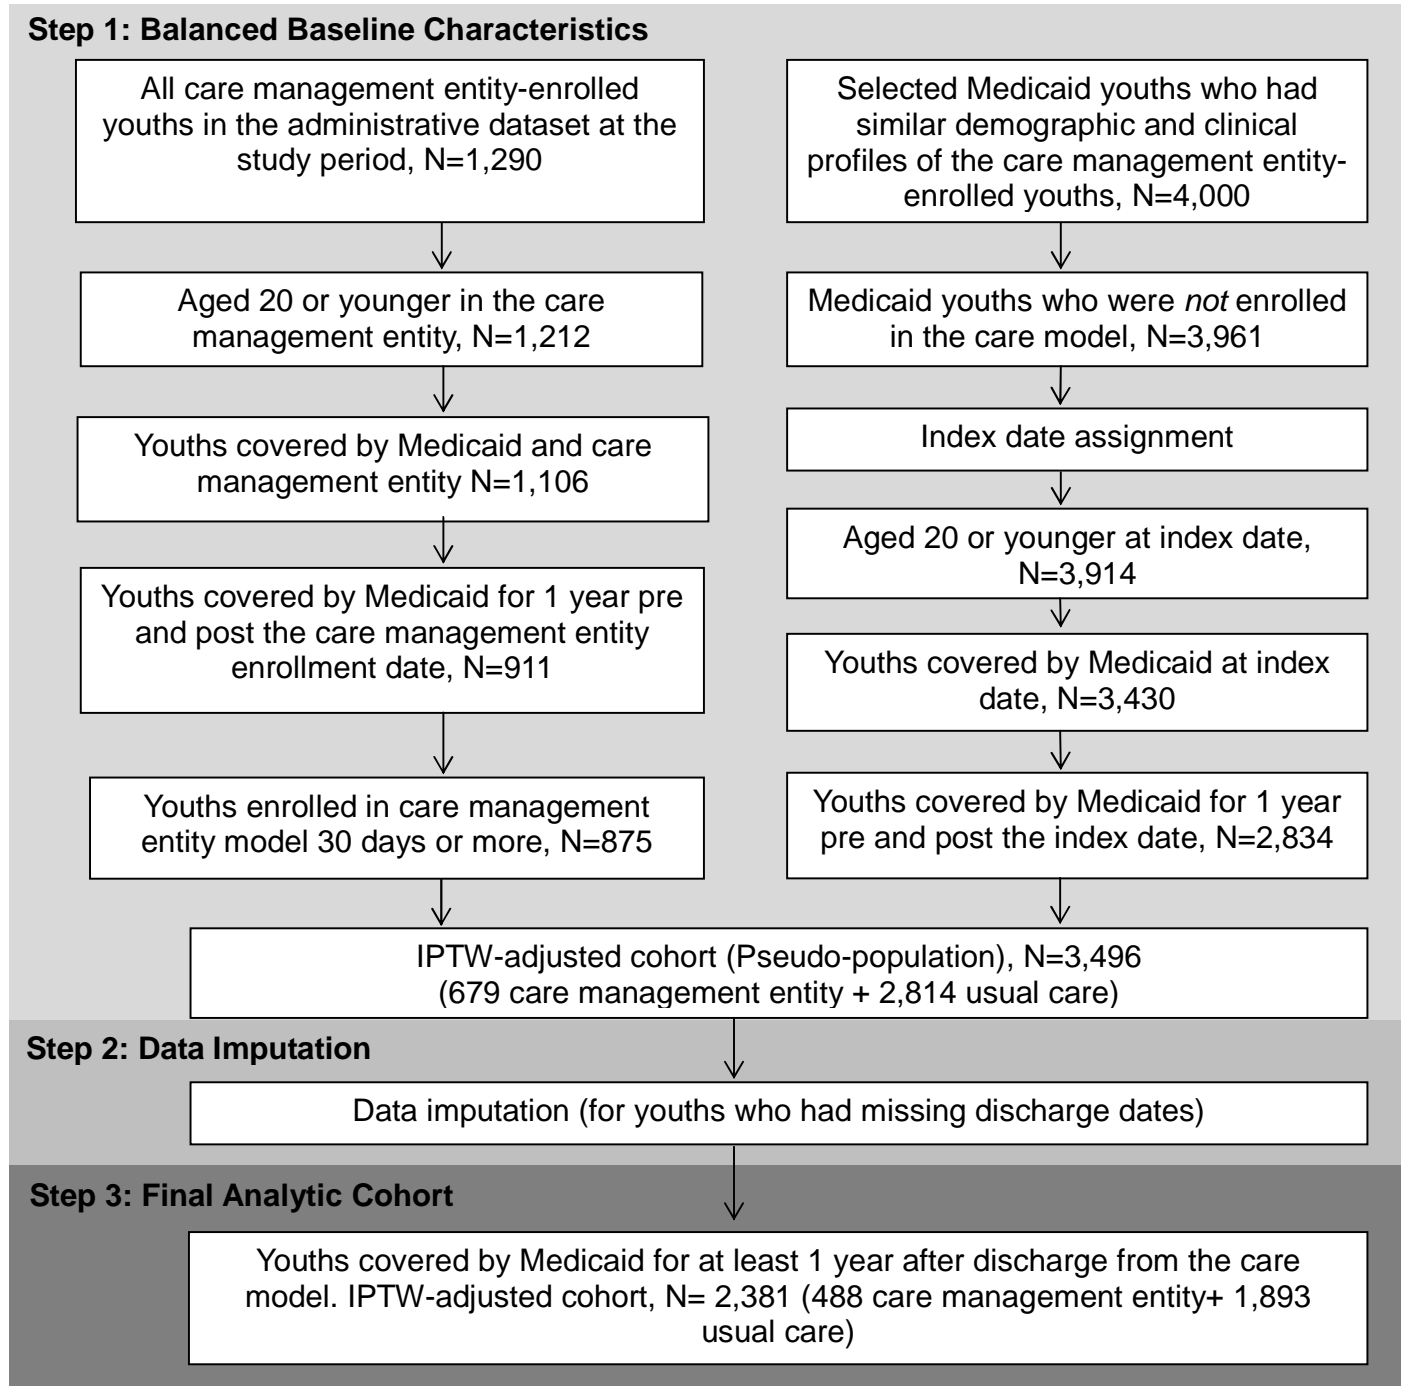

Supplement: appi.ps.201600539.ds001.pdf [file appi.ps.201600539.ds001.pdf]
